# Supplementary material for: Knowledge of Adverse Drug Reaction Reporting and the Pharmacovigilance of Biological Medicines: A Survey of Healthcare Professionals in Ireland
Source: PubMed Central journal article supplement — BioDrugs. 2018 May 2;32(3):267–80. doi: 10.1007/s40259-018-0281-6 (PMC5990561; doi:10.1007/s40259-018-0281-6), 2018-05-02
Supplement: 40259_2018_281_MOESM1_ESM.pdf [file 40259_2018_281_MOESM1_ESM.pdf]

# Electronic supplementary material

**Article title:** Knowledge of Adverse Drug Reaction Reporting and the Pharmacovigilance of Biological Medicines: A Survey of Healthcare Professionals in Ireland

**Journal name:** Biodrugs

**Author names:** Joan O'Callaghan, Brendan T. Griffin, John M. Morris, Margaret Bermingham

**Corresponding author:** Margaret Bermingham PhD, School of Pharmacy, Cavanagh Pharmacy Building, University College Cork, Cork, Ireland. Email: [Margaret.bermingham@ucc.ie](mailto:Margaret.bermingham@ucc.ie)

## Questionnaire

## Welcome to my survey on adverse drug reaction reporting

I am a pharmacist undertaking a MSc. in the School of Pharmacy, University College Cork. As part of my research I am conducting a survey on awareness, attitudes and practice behaviours of healthcare professionals relating to adverse drug reaction reporting. The questionnaire has a specific focus on biological medicines. This research is part of a Regulatory Science Ireland (RSI) project and involves a joint collaboration between the Health Products Regulatory Authority (HPRA) and University College Cork. RSI is a voluntary network of interested parties from the HPRA, Academia, Industry and Government Agencies.

Registered physicians, nurses and pharmacists working in the Republic of Ireland can contribute to this research by completing the multiple choice questions that follow.

The questionnaire is straightforward and should take no longer than 10 minutes to complete. You are not required to look up any information. The questions focus on your awareness, attitudes and behaviours.

You may participate regardless of your previous experience with adverse drug reaction reporting or biological medicines.

Participation is of course voluntary. You can give your informed consent to participate in this research by completing the questionnaire online. You can withdraw from the questionnaire at any time before completion. You will not be asked to give your name or identifying information. For more information on the study and what is involved, please read the information sheet for survey respondents. If you have any questions about the survey please contact Joan O'Callaghan at [joan.ocallaghan@hpra.ie](mailto:joan.ocallaghan@hpra.ie).

Thank you for taking the time to read the above. Your input is highly valued and I hope you will participate.

Joan O'Callaghan BSc. Pharm. M.P.S.I.

## Demographics

1. Are you a

- Consultant
- Non-consultant hospital doctor
- General practitioner
- Nurse/Midwife
- Pharmacist
- Other (please specify)

## Physician Demographics

2. How many years are you registered as a medical practitioner?

- < 5 years
- 5 - 9 years
- 10 - 19 years
- 20 - 29 years
- > 30 years

3. Please indicate the therapeutic area in which you practice?

- Nephrology
- Rheumatology
- Gastroenterology
- Endocrinology
- Neurology
- Dermatology
- Oncology
- Haematology
- Haematology/Oncology
- Geriatric Medicine
- Other (please specify)

4. Do you ever prescribe medicines to patients under your care?

- Yes
- No
- Other (please specify)

## Pharmacist Demographics

5. How many years are you registered as a pharmacist?

- < 5 years
- 5 - 9 years
- 10 - 19 years
- 20 - 29 years
- > 30 years

6. What is your main area of practice?

- Community
- Hospital
- Industry
- Other (please specify)

## General Practitioner Demographics

7. How many years are you registered as a General Practitioner?

- < 5 years
- 5 - 9 years
- 10 - 19 years
- 20 - 29 years
- > 30 years

## Other Demographics

8. How many years have you been in practice?

- < 5 years
- 5 - 9 years
- 10 - 19 years
- 20 - 29 years
- > 30 years



## Nurse/Midwife Demographics

9. How many years has it been since you first entered practice?

- < 5 years
- 5 - 9 years
- 10 - 19 years
- 20 - 29 years
- > 30 years

10. Are you a (choose all that apply):

- Registered General Nurse
- Registered Midwife
- Registered Nurse Prescriber
- Registered Advanced Nurse Practitioner
- Registered Advanced Midwife Practitioner
- Registered Children's Nurse
- Registered Psychiatric Nurse
- Registered Nurse Intellectual Disability
- Registered Public Health Nurse
- Registered Nurse Tutor
- Other (please specify)

11. Please provide details of your practice area?

## Adverse Drug Reaction Reporting

**An adverse drug reaction is a response to a medicine which is noxious and unintended. An adverse drug reaction can be reported directly to the Health Products Regulatory Authority (formerly Irish Medicines Board) or to the manufacturer of the medicine.**

12. Prior to this survey, did you know that an adverse drug reaction could be reported directly to the Health Products Regulatory Authority (HPRA)?

Yes

No

13. Have you ever reported an adverse drug reaction?

No (0 times)

Yes (1 time)

Yes (2 or more times)

Yes (> 3 times)

14. Do you think that:

Yes

No

Don't know

You have adequate knowledge on how to report an adverse drug reaction?

Healthcare professionals should report serious adverse drug reactions even if uncertain that the medicine caused the event

Healthcare professionals should report serious adverse drug reactions even if they do not have all the details of the event (e.g. complete patient history, demographic data)

All serious adverse drug reactions are known before a medicine is marketed

HPRA will not disclose an adverse drug reaction reporters identity in response to a request from the public

One case reported by a healthcare professional **does not** contribute much to knowledge on medicine risks

Patients can report adverse drug reactions independent of a healthcare professional

Healthcare professionals should report adverse drug reactions associated with overdose, misuse or error

## Additional Monitoring

**The safety of all medicines is monitored on an ongoing basis. In some cases a medicine may be subject to additional monitoring. This is generally because there is less information available on it than on other medicines. It does not mean that the medicine is unsafe. Healthcare professionals are encouraged to report all adverse drug reactions, irrespective of severity, for medicines under additional monitoring.**

15. Prior to this survey were you aware that some medicines are subject to additional monitoring?

Yes

No

## Additional Monitoring

16. Prior to this survey did you know that when a medicine is subject to additional monitoring an inverted black triangle ▼ appears beside the name of the medicine in the summary of product characteristics and package leaflet?

- Yes
- No

17. Are you aware when medicines used in your practice are subject to additional monitoring?

- Never
- Rarely
- Sometimes
- Frequently
- Always

18. Do you inform your patients when their medicines are subject to additional monitoring?

- Never
- Rarely
- Sometimes
- Frequently
- Always
- Not applicable (I do not work directly with patients)

## Biological Medicines: Awareness

19. How familiar are you with the term biological medicine?

- Never heard of the term
- Heard of the term - can't define it
- Familiar - I've a basic understanding
- Very familiar - I've a complete understanding

20. How familiar are you with the term biosimilar medicine?

- Never heard of the term
- Heard of the term - can't define it
- Familiar - I've a basic understanding
- Very familiar - I've a complete understanding

## Biological Medicines: Awareness

**Biological medicines are produced from biological sources, such as animals, human blood, or the cells of a living organism. Examples of biological medicines include monoclonal antibodies (e.g. infliximab), insulins, heparins, vaccines and blood products. A biosimilar is a biological medicine which is highly similar to an original biological medicine.**

21. Do you think that:

|                                                                                                                                                                 | Yes                   | No                    | Don't know            |
|-----------------------------------------------------------------------------------------------------------------------------------------------------------------|-----------------------|-----------------------|-----------------------|
| Biosimilars are the same as generic medicines                                                                                                                   | <input type="radio"/> | <input type="radio"/> | <input type="radio"/> |
| In an adverse drug reaction report it is better to identify a biological medicine by its non-proprietary name (e.g. insulin glargine) instead of its brand name | <input type="radio"/> | <input type="radio"/> | <input type="radio"/> |
| In general, biological medicines pose a greater risk of immunogenicity than non-biological (chemical) medicines                                                 | <input type="radio"/> | <input type="radio"/> | <input type="radio"/> |
| Different batches of the same biological medicine are always identical                                                                                          | <input type="radio"/> | <input type="radio"/> | <input type="radio"/> |
| Rare adverse drug reactions resulting from changes to the manufacturing process of a biological medicine can always be predicted                                | <input type="radio"/> | <input type="radio"/> | <input type="radio"/> |
| It is more important to include batch numbers in adverse drug reaction reports for non-biological medicines than it is for biological medicines                 | <input type="radio"/> | <input type="radio"/> | <input type="radio"/> |
| Keeping a biological medicine outside its recommended storage conditions may introduce or alter immunogenicity                                                  | <input type="radio"/> | <input type="radio"/> | <input type="radio"/> |
| Adverse drug reactions associated with a patient changing between different brands of biological medicine should be reported                                    | <input type="radio"/> | <input type="radio"/> | <input type="radio"/> |



## Biological Medicines: Experience

22. Are biological medicines prescribed/dispensed/administered in your practice?

- Yes
- No
- Don't know

## Biological Medicines: Behaviours and Attitudes

23. In your practice how are the **names** of biological medicines that have been prescribed/dispensed/administered to patients generally recorded?

- Brand name
- Non-proprietary name (e.g. insulin glargine)
- Both brand name and non-proprietary name
- Don't know
- Varies by medicine (please specify)

24. In your practice are the **batch numbers of biological medicines** that have been administered/dispensed to patients generally recorded?

- Yes
- No
- Don't know
- Yes, but only for some medicines (please specify)

**Please mark your response to the following questions on each scale ranging from 1 to 7**

25. Do you believe that recording the brand names of **all** biological medicines prescribed/administered/dispensed to patients is:

|                              | 1                     | 2                     | 3                     | 4                     | 5                     | 6                     | 7                     |
|------------------------------|-----------------------|-----------------------|-----------------------|-----------------------|-----------------------|-----------------------|-----------------------|
| Worthless (1) - Valuable (7) | <input type="radio"/> |
| Easy (1) - Difficult (7)     | <input type="radio"/> |

Any other comments

26. Do you believe that recording batch numbers of **all** biological medicines administered/dispensed to patients is

|                              | 1                     | 2                     | 3                     | 4                     | 5                     | 6                     | 7                     |
|------------------------------|-----------------------|-----------------------|-----------------------|-----------------------|-----------------------|-----------------------|-----------------------|
| Worthless (1) - Valuable (7) | <input type="radio"/> |
| Easy (1) - Difficult (7)     | <input type="radio"/> |

Any other comments

## Supplementary Tables

Table S1

Hospital doctor specialities

| <b>Specialty</b>                  | <b>Percentage</b> | <b>Number</b> |
|-----------------------------------|-------------------|---------------|
| Cardiology                        | 3.4%              | 3             |
| Cardiology and internal medicine  | 1.1%              | 1             |
| Dermatology                       | 3.4%              | 3             |
| Endocrinology                     | 6.8%              | 6             |
| Gastroenterology                  | 15.9%             | 14            |
| General Medicine                  | 4.6%              | 4             |
| Geriatric Medicine                | 2.3%              | 2             |
| Geriatrics                        | 3.4%              | 3             |
| Geriatrics and general medicine   | 1.1%              | 1             |
| Geriatrics and internal medicine  | 1.1%              | 1             |
| Haematology                       | 1.1%              | 1             |
| Histopathology                    | 1.1%              | 1             |
| Infectious diseases               | 1.1%              | 1             |
| Internal medicine                 | 3.4%              | 3             |
| Neonatology                       | 1.1%              | 1             |
| Nephrology                        | 5.7%              | 5             |
| Neurology                         | 3.4%              | 3             |
| Obstetrics and gynaecology        | 11.4%             | 10            |
| Oncology                          | 2.3%              | 2             |
| Paediatrics                       | 8.0%              | 7             |
| Palliative                        | 3.4%              | 3             |
| Psychiatry                        | 1.1%              | 1             |
| Rehabilitation                    | 1.1%              | 1             |
| Respiratory and internal medicine | 1.1%              | 1             |
| Respiratory medicine              | 2.3%              | 2             |
| Rheumatology                      | 9.1%              | 8             |
|                                   | 100.0%            | 88            |

Table S2

*Nurse registration details*

| <b>Registration status*</b>              | <b>Percentage</b> | <b>Number</b> |
|------------------------------------------|-------------------|---------------|
| Registered general nurse                 | 68.3%             | 71            |
| Registered midwife                       | 11.5%             | 12            |
| Registered nurse prescriber              | 13.5%             | 14            |
| Registered advanced nurse practitioner   | 4.8%              | 5             |
| Registered children's nurse              | 4.8%              | 5             |
| Registered psychiatric nurse             | 18.3%             | 19            |
| Registered nurse intellectual disability | 9.6%              | 10            |
| Registered public health nurse           | 6.7%              | 7             |
| Registered nurse tutor                   | 2.9%              | 3             |
| Other*                                   | 9.6%              | 10            |

*Other clinical nurse specialist (n=2), nurse manager (n=4), Director of nursing (n=1), candidate advanced nurse practitioner (n=1), candidate advanced nurse prescriber (n=1), tissue viability nurse (n=1)*

*\* Nurses could choose more than one option*

Table S3

Details of suspected new adverse reaction reports for human medicines received by Health Products Regulatory Authority (HPRA) from 2012 to 2016. Information obtained from annual reports published on the HPRA website ([www.hpra.ie](http://www.hpra.ie)).

| <b>Year</b>                                                  | 2012 | 2013 | 2014 | 2015 | 2016 | Average |
|--------------------------------------------------------------|------|------|------|------|------|---------|
| <b>Total number of new adverse reaction reports received</b> | 2757 | 2835 | 2884 | 2810 | 3264 | 2910    |
| <b>Percentage reports received</b>                           |      |      |      |      |      |         |
| <b>Pharmaceutical company</b>                                | 69%  | 64%  | 67%  | 67%  | 69%  | 67%     |
| <b>Patient/consumer</b>                                      | 2%   | 1%   | 3%   | 8%   | 10%  | 5%      |
| <b>Community pharmacist</b>                                  | 4%   | 4%   | 4%   | 4%   | 4%   | 4%      |
| <b>General practitioner</b>                                  | 5%   | 5%   | 4%   | 4%   | 3%   | 4%      |
| <b>Nurse</b>                                                 | 3%   | 5%   | 4%   | 4%   | 3%   | 4%      |
| <b>Community care doctor</b>                                 | 8%   | 9%   | 7%   | 4%   | 3%   | 6%      |
| <b>Hospital pharmacist</b>                                   | 4%   | 4%   | 4%   | 4%   | 3%   | 4%      |
| <b>Hospital doctor/specialist</b>                            | 5%   | 4%   | 4%   | 3%   | 2%   | 4%      |
| <b>Other</b>                                                 | <2%  | 4%   | 1%   | 1%   | 2%   | 2%      |
| <b>Clinical trial reports</b>                                | 0%   | -    | 2%   | 1%   | 1%   | 1%      |

Table S4

Adverse Drug Reaction reporting. Responses to individual knowledge items by each healthcare professional group

|                                                                                                                                               | n   | % correct* | % incorrect | % don't know |
|-----------------------------------------------------------------------------------------------------------------------------------------------|-----|------------|-------------|--------------|
| All serious ADRs are known before a medicine is marketed (No)                                                                                 |     |            |             |              |
| Hospital doctor                                                                                                                               | 88  | 94.3%      | 3.4%        | 2.3%         |
| General practitioner                                                                                                                          | 196 | 83.7%      | 9.2%        | 7.1%         |
| Nurse                                                                                                                                         | 104 | 61.5%      | 21.2%       | 17.3%        |
| Community pharmacist                                                                                                                          | 168 | 92.3%      | 5.4%        | 2.4%         |
| Hospital pharmacist                                                                                                                           | 87  | 95.4%      | 3.4%        | 1.1%         |
| Other pharmacist                                                                                                                              | 53  | 98.1%      | 1.9%        | 0%           |
| HCPs should report serious ADRs even if uncertain that the medicine caused the event (Yes)                                                    |     |            |             |              |
| Hospital doctor                                                                                                                               | 88  | 92.0%      | 2.3%        | 5.7%         |
| General practitioner                                                                                                                          | 197 | 87.3%      | 2.5%        | 10.2%        |
| Nurse                                                                                                                                         | 104 | 89.4%      | 3.8%        | 6.7%         |
| Community pharmacist                                                                                                                          | 169 | 83.4%      | 3.6%        | 13.0%        |
| Hospital pharmacist                                                                                                                           | 87  | 95.4%      | 0%          | 4.6%         |
| Other pharmacist                                                                                                                              | 53  | 96.2%      | 0%          | 3.8%         |
| You have adequate knowledge on how to report ADRs (Yes)                                                                                       |     |            |             |              |
| Hospital doctor                                                                                                                               | 88  | 46.6%      | 40.9%       | 12.5%        |
| General practitioner                                                                                                                          | 197 | 48.7%      | 43.7%       | 7.6%         |
| Nurse                                                                                                                                         | 103 | 48.5%      | 40.8%       | 10.7%        |
| Community pharmacist                                                                                                                          | 169 | 63.3%      | 24.3%       | 12.4%        |
| Hospital pharmacist                                                                                                                           | 87  | 88.5%      | 6.9%        | 4.6%         |
| Other pharmacist                                                                                                                              | 53  | 88.7%      | 7.5%        | 3.8%         |
| One case reported by a HCP does not contribute much to knowledge on medicine risks (No)                                                       |     |            |             |              |
| Hospital doctor                                                                                                                               | 88  | 85.2%      | 6.8%        | 8%           |
| General practitioner                                                                                                                          | 197 | 83.8%      | 6.1%        | 10.2%        |
| Nurse                                                                                                                                         | 103 | 80.6%      | 9.7%        | 9.7%         |
| Community pharmacist                                                                                                                          | 168 | 75.6%      | 12.5%       | 11.9%        |
| Hospital pharmacist                                                                                                                           | 87  | 87.4%      | 4.6%        | 8.0%         |
| Other pharmacist                                                                                                                              | 53  | 90.6%      | 5.7%        | 3.8%         |
| HCPs should report serious ADRs even if they do not have all the details of the event (e.g. complete patient history, demographic data) (Yes) |     |            |             |              |
| Hospital doctor                                                                                                                               | 88  | 75.0%      | 15.9%       | 9.1%         |
| General practitioner                                                                                                                          | 196 | 75.5%      | 12.2%       | 12.2%        |
| Nurse                                                                                                                                         | 103 | 70.9%      | 14.6%       | 14.6%        |
| Community pharmacist                                                                                                                          | 169 | 78.1%      | 7.1%        | 14.8%        |
| Hospital pharmacist                                                                                                                           | 87  | 86.2%      | 5.7%        | 8.0%         |
| Other pharmacist                                                                                                                              | 53  | 94.3%      | 3.8%        | 1.9%         |
| HCPs should report ADRs associated with overdose, misuse or error (Yes)                                                                       |     |            |             |              |
| Hospital doctor                                                                                                                               | 88  | 52.3%      | 20.5%       | 27.3%        |
| General practitioner                                                                                                                          | 195 | 47.2%      | 17.9%       | 34.9%        |
| Nurse                                                                                                                                         | 103 | 78.6%      | 9.7%        | 11.7%        |
| Community pharmacist                                                                                                                          | 169 | 63.9%      | 11.8%       | 24.3%        |
| Hospital pharmacist                                                                                                                           | 87  | 58.6%      | 19.5%       | 21.8%        |
| Other pharmacist                                                                                                                              | 53  | 83.0%      | 7.5%        | 9.4%         |
| Patients can report ADRs independent of a HCP (Yes)                                                                                           |     |            |             |              |
| Hospital doctor                                                                                                                               | 88  | 47.7%      | 11.4%       | 40.9%        |
| General practitioner                                                                                                                          | 197 | 48.7%      | 4.1%        | 47.2%        |
| Nurse                                                                                                                                         | 104 | 76.9%      | 6.7%        | 16.3%        |
| Community pharmacist                                                                                                                          | 169 | 66.9%      | 5.3%        | 27.8%        |
| Hospital pharmacist                                                                                                                           | 87  | 67.8%      | 9.2%        | 23.0%        |
| Other pharmacist                                                                                                                              | 52  | 94.2%      | 0%          | 5.8%         |
| HPRA will not disclose and ADR reporters identity in response to a request from the public (Yes)                                              |     |            |             |              |
| Hospital doctor                                                                                                                               | 88  | 52.3%      | 4.5%        | 43.2%        |
| General practitioner                                                                                                                          | 197 | 37.1%      | 7.1%        | 55.8%        |



|                      |     |       |       |       |
|----------------------|-----|-------|-------|-------|
| Nurse                | 104 | 43.3% | 12.5% | 44.2% |
| Community pharmacist | 167 | 43.7% | 7.2%  | 49.1% |
| Hospital pharmacist  | 87  | 50.6% | 6.9%  | 42.5% |
| Other pharmacist     | 53  | 69.8% | 5.7%  | 24.5% |

*\*Correct answer is shown in brackets*

*ADR, Adverse drug reaction; HCP, Healthcare professional; HPRA, Health Products Regulatory Authority*

Table S5

Pharmacovigilance considerations for biological medicines: Response to individual knowledge items from individual HCP groups

| Question (*)                                                                                                                                       | n   | % correct | %incorrect | % don't know |
|----------------------------------------------------------------------------------------------------------------------------------------------------|-----|-----------|------------|--------------|
| ADRs associated with a patient changing between different brands of biological medicines should be reported (Yes)                                  |     |           |            |              |
| Hospital doctor                                                                                                                                    | 88  | 93.2%     | 2.3%       | 4.5%         |
| General practitioner                                                                                                                               | 194 | 85.1%     | 2.1%       | 12.9%        |
| Nurse                                                                                                                                              | 104 | 93.3%     | 0%         | 6.7%         |
| Community pharmacist                                                                                                                               | 168 | 94.6%     | 0.6%       | 4.8%         |
| Hospital pharmacist                                                                                                                                | 87  | 97.7%     | 0%         | 2.3%         |
| Other pharmacist                                                                                                                                   | 53  | 96.2%     | 0%         | 3.8%         |
| In an ADR report it is better to identify a biological medicine by its non-proprietary name (e.g. insulin glargine) instead of its brand name (No) |     |           |            |              |
| Hospital doctor                                                                                                                                    | 87  | 57.5%     | 35.6%      | 6.9%         |
| General practitioner                                                                                                                               | 195 | 56.9%     | 27.7%      | 15.4%        |
| Nurse                                                                                                                                              | 104 | 25.0%     | 55.8%      | 19.2%        |
| Community pharmacist                                                                                                                               | 169 | 65.7%     | 18.3%      | 16.0%        |
| Hospital pharmacist                                                                                                                                | 87  | 86.2%     | 9.2%       | 4.6%         |
| Other pharmacist                                                                                                                                   | 53  | 81.1%     | 15.1%      | 3.8%         |
| Biosimilars are the same as generic medicines (No)                                                                                                 |     |           |            |              |
| Hospital doctor                                                                                                                                    | 88  | 73.9%     | 15.9%      | 10.2%        |
| General practitioner                                                                                                                               | 194 | 73.2%     | 9.8%       | 17.0%        |
| Nurse                                                                                                                                              | 102 | 43.1%     | 23.5%      | 33.3%        |
| Community pharmacist                                                                                                                               | 169 | 82.8%     | 6.5%       | 10.7%        |
| Hospital pharmacist                                                                                                                                | 87  | 89.7%     | 5.7%       | 4.6%         |
| Other pharmacist                                                                                                                                   | 53  | 98.1%     | 1.9%       | 0%           |
| Rare ADRs resulting from changes to the manufacturing process of a biological medicine can always be predicted (No)                                |     |           |            |              |
| Hospital doctor                                                                                                                                    | 88  | 94.3%     | 1.1%       | 4.5%         |
| General practitioner                                                                                                                               | 195 | 80.5%     | 0%         | 19.5%        |
| Nurse                                                                                                                                              | 104 | 68.3%     | 2.9%       | 28.8%        |
| Community pharmacist                                                                                                                               | 169 | 79.3%     | 2.4%       | 18.3%        |
| Hospital pharmacist                                                                                                                                | 87  | 94.3%     | 0%         | 5.7%         |
| Other pharmacist                                                                                                                                   | 53  | 94.3%     | 1.9%       | 3.8%         |
| Keeping a biological medicine outside its recommended storage conditions may introduce or alter immunogenicity (Yes)                               |     |           |            |              |
| Hospital doctor                                                                                                                                    | 88  | 83.0%     | 1.1%       | 15.9%        |
| General practitioner                                                                                                                               | 195 | 78.5%     | 0.5%       | 21.0%        |
| Nurse                                                                                                                                              | 104 | 85.6%     | 0%         | 14.4%        |
| Community pharmacist                                                                                                                               | 169 | 78.1%     | 0%         | 21.9%        |
| Hospital pharmacist                                                                                                                                | 85  | 76.5%     | 4.7%       | 18.8%        |
| Other pharmacist                                                                                                                                   | 53  | 83.0%     | 1.9%       | 15.1%        |
| Different batches of the same biological medicine are always identical (No)                                                                        |     |           |            |              |
| Hospital doctor                                                                                                                                    | 87  | 89.7%     | 2.3%       | 8.0%         |
| General practitioner                                                                                                                               | 195 | 62.6%     | 8.2%       | 29.2%        |
| Nurse                                                                                                                                              | 104 | 51.9%     | 9.6%       | 38.5%        |
| Community pharmacist                                                                                                                               | 169 | 69.8%     | 11.2%      | 18.9%        |
| Hospital pharmacist                                                                                                                                | 87  | 87.4%     | 5.7%       | 6.9%         |
| Other pharmacist                                                                                                                                   | 53  | 90.6%     | 5.7%       | 3.8%         |
| It is more important to include batch numbers in ADR reports for non-biological medicines than it is for biological medicines (No)                 |     |           |            |              |
| Hospital doctor                                                                                                                                    | 87  | 52.9%     | 26.4%      | 20.7%        |
| General practitioner                                                                                                                               | 195 | 55.9%     | 11.8%      | 32.3%        |
| Nurse                                                                                                                                              | 103 | 49.5%     | 25.2%      | 25.2%        |
| Community pharmacist                                                                                                                               | 168 | 62.5%     | 18.5%      | 19.0%        |
| Hospital pharmacist                                                                                                                                | 87  | 83.9%     | 12.6%      | 3.4%         |

|                                                                                                                      |     |       |       |       |
|----------------------------------------------------------------------------------------------------------------------|-----|-------|-------|-------|
| Other pharmacist                                                                                                     | 53  | 77.4% | 17.0% | 5.7%  |
| In general biological medicines pose a greater risk of immunogenicity than non-biological (chemical) medicines (Yes) |     |       |       |       |
| Hospital doctor                                                                                                      | 88  | 81.8% | 5.7%  | 12.5% |
| General practitioner                                                                                                 | 194 | 56.7% | 2.6%  | 40.7% |
| Nurse                                                                                                                | 102 | 26.5% | 13.7% | 59.8% |
| Community pharmacist                                                                                                 | 169 | 61.5% | 8.9%  | 29.6% |
| Hospital pharmacist                                                                                                  | 87  | 80.5% | 11.5% | 8.0%  |
| Other pharmacist                                                                                                     | 53  | 86.8% | 7.5%  | 5.7%  |

*\*Correct answer is shown in brackets*

*ADR, Adverse drug reaction;*

Table S6

Recording of biological medicines by brand name among healthcare professionals who use biological medicines in their practice. Survey question: In your practice are the brand names of biological medicines that have been administered/dispensed to patients generally recorded?

| Profession           | n   | Brand name* | Non-proprietary name | Varies by medicine | Don't know |
|----------------------|-----|-------------|----------------------|--------------------|------------|
| Hospital doctor      | 69  | 75.3%       | 15.9%                | 5.8%               | 2.9%       |
| General practitioner | 144 | 87.5%       | 5.6%                 | 3.5%               | 3.5%       |
| Nurse                | 54  | 77.8%       | 13.0%                | 3.7%               | 5.6%       |
| Community pharmacist | 149 | 96.0%       | 0%                   | 4.0%               | 0%         |
| Hospital pharmacist  | 73  | 87.7%       | 5.5%                 | 6.8%               | 0%         |
| Other pharmacist     | 15  | 100%        | 0%                   | 0%                 | 0%         |
| Total                | 504 | 87.7%       | 6.0%                 | 4.4%               | 2.0%       |

\* Respondents indicated that biological medicine was recorded by either 'Brand name' or 'Brand name and non-proprietary name'.

Table S7

Attitudes to brand name and batch number recording among healthcare professionals who use biological medicines in their practice

| Profession                          | n   | Mean score | Standard deviation |
|-------------------------------------|-----|------------|--------------------|
| <b>Worthless (1) - Valuable (7)</b> |     |            |                    |
| Brand name recording                | 489 | 5.98       | 1.44               |
| Batch number recording              | 496 | 5.47       | 1.65               |
| <b>Easy (1) – Difficult (7)</b>     |     |            |                    |
| Brand name recording                | 496 | 3.60       | 2.25               |
| Batch number recording              | 492 | 4.61       | 2.04               |

Survey questions: Please mark your response on each scale ranging from 1 to 7. **Q1.** Do you believe that recording the brand names of biological medicines prescribed/administered/dispensed to patients is worthless (1) to valuable (7) and (ii) easy (1) to difficult? **Q2.** Do you believe that recording batch numbers of biological medicines administered/dispensed to patients is (i) worthless (1) to valuable (7) and (ii) easy (1) to difficult?

Table S8

Proportions of healthcare professionals aware of additional monitoring who inform their patients about the additional monitoring status of a medicine

| <b>Profession</b>           | <b>n*</b> | <b>Never/Rarely</b> | <b>Sometimes</b> | <b>Frequently/Always</b> |
|-----------------------------|-----------|---------------------|------------------|--------------------------|
| <b>Hospital doctor</b>      | 73        | 58.9%               | 19.2%            | 22.0%                    |
| <b>General Practitioner</b> | 132       | 57.6%               | 17.4%            | 25.0%                    |
| <b>Nurse</b>                | 62        | 41.9%               | 11.3%            | 46.8%                    |
| <b>Community pharmacist</b> | 153       | 59.5%               | 24.8%            | 15.7%                    |
| <b>Hospital pharmacist</b>  | 66        | 68.2%               | 13.6%            | 18.2%                    |
| <b>'Other' pharmacist</b>   | 20        | 60.0%               | 30.0%            | 10.0%                    |
| <b>Total</b>                | 506       | 57.9%               | 19.2%            | 23.0%                    |

\* Excludes those who answered 'Not applicable (I do not work directly with patients)'

Survey question: Do you inform your patients when their medicines are subject to additional monitoring?
